# Supplementary material
Source: HighWire-hosted journal article supplement (https://www.ajnr.org/highwire/filestream/103466/field_highwire_adjunct_files/0/0319.pdf)
Supplement: 0319.pdf [file 0319.pdf]

## ONLINE SUPPLEMENTAL DATA

# **Intra-Arterial Thrombolysis Is Associated With Delayed Reperfusion of Remaining Vessel Occlusions Following Incomplete Thrombectomy**

### **Table of Contents**

- Methods S1 Acquisition of Perfusion Imaging
- Methods S2 Inverse Probability of Treatment Weighting Method
- Table S1 Intervention and Outcome Characteristics Of Study Population
- Table S2 Multivariable Logistic Regression Analysis of the Unmatched Cohort
- Table S3 Balance of the IPTW-matched Cohort
- Table S4 Differences in Unadjusted Odds Ratios and Point Causal Effects Between Unmatched and Matched Cohort
- Table S5 Secondary Outcomes In The IPTW Matched Cohort
- Figure S1 Flow Chart
- Figure S2 Perfusion Imaging Evaluation
- Figure S3 Group Balance Before and After IPTW Matching

## Methods S1 Acquisition of Perfusion Imaging

Pre-interventional and follow-up imaging was performed on either computed tomography (CT; SOMATOM Definition Edge, Siemens, Erlangen, Germany) or magnetic resonance imaging (MRI; 1.5/3T MRI Avanto, Avanto fit, Verio, Aera, Skyra fit and Vida, Siemens, Erlangen, Germany). Perfusion data from CT were postprocessed with syngo.via software (Siemens) and MRI data with Olea Sphere software (Olea Sphere v2.3; Olea Medical). Following perfusion maps were generated: time to maximum (Tmax), time to peak (TTP), relative cerebral blood volume (rCBV), relative cerebral blood flow (rCBF), mean transit time (MTT) and temporal maximum intensity projection map.

## Methods S2 Inverse Probability of Treatment Weighting Method

Propensity scores present probabilities for every patient to be assigned to the intervention group (i.e. receiving intra-arterial urokinase), conditioned on observed confounders. Patients with similar propensity scores are comparable, meaning that confounding variables are balanced. This helps in estimating the unconfounded effect for the variable of interest (i.e. perfusion imaging outcome: DR and PPD). Effectiveness of propensity score matching and balance between the groups was checked with the measurement of standardized mean differences and empirical cumulative density function statistics. Value of these two measures close to zero indicates good balance.<sup>1,2</sup> IPTW duplicates observations with large weights and creates pseudo-observations where probability of receiving the intervention does not depend on the covariates included in the propensity score estimations. This excludes confounding and enables comparison of weighted averages for the outcome of interest in the population with and without the intervention.<sup>3</sup> IPTW results may be presented as points of average treatment effect, which quantify treatment impact by comparing the outcomes of different treatment values.

Table S1 Intervention and Outcome Characteristics Of Study Population

|                                            | <b>Overall</b> | <b>IA Urokinase -</b> | <b>IA Urokinase +</b> | <b>p</b> | <b>Missing (%)</b> |
|--------------------------------------------|----------------|-----------------------|-----------------------|----------|--------------------|
| n                                          | 459            | 419                   | 40                    |          |                    |
| <b>INTERVENTION</b>                        |                |                       |                       |          |                    |
| Intravenous Thrombolysis = Yes (%)         | 182 (39.7)     | 164 (39.1)            | 18 (45.0)             | 0.579    | 0                  |
| Maneuver count (median [IQR])              | 2 [1, 3]       | 2 [1, 3]              | 2 [1, 3]              | 0.902    |                    |
| eTICI (%)                                  |                |                       |                       | <0.001   | 0                  |
| 1                                          | 3 (0.7)        | 0 (0.0)               | 3 (7.5)               |          |                    |
| 2a                                         | 35 (7.6)       | 26 (6.2)              | 9 (22.5)              |          |                    |
| 2b50                                       | 76 (16.6)      | 60 (14.3)             | 16 (40.0)             |          |                    |
| 2b67                                       | 176 (38.3)     | 166 (39.6)            | 10 (25.0)             |          |                    |
| 2c                                         | 169 (36.8)     | 167 (39.9)            | 2 (5.0)               |          |                    |
| <b>OUTCOME</b>                             |                |                       |                       |          |                    |
| Perfusion Imaging Outcome (%)              |                |                       |                       | 0.124    | 0                  |
| Delayed Reperfusion                        | 276 (60.1)     | 257 (61.3)            | 21 (52.5)             |          |                    |
| Persistent Perfusion Deficit               | 183 (39.9)     | 162 (38.7)            | 19 (47.5)             |          |                    |
| New infarct on 24-hour follow-up = Yes (%) | 243 (53.1)     | 223 (53.3)            | 20 (50.0)             | 0.811    | 0.2                |
| sICH on 24-hour follow-up = Yes (%)        | 24 (5.2)       | 21 (5.0)              | 3 (7.5)               | 0.761    | 0                  |
| 90-Day mRS score 0-2 (%)                   | 252 (55.1)     | 226 (54.1)            | 26 (66.7)             | 0.179    | 0.4                |
| 90-Day mortality                           | 69 (17.8)      | 67 (17.8)             | 2 (6.7)               | 0.191    | 11.3               |

eTICI - extended Thrombolysis in Cerebral Infarction; sICH - symptomatic intracranial hemorrhage; mRS - Modified Rankin scale

Table S2 Multivariable Logistic Regression Analysis of the Unmatched Cohort

| Predictor                          | Delayed reperfusion  |             |                  |
|------------------------------------|----------------------|-------------|------------------|
|                                    | Adjusted Odds Ratios | 95% CI      | P-Value          |
| Age                                | 0.99                 | 0.97 – 1.01 | 0.205            |
| Sex                                | 1.41                 | 0.90 – 2.23 | 0.138            |
| Atrial fibrillation                | 1.96                 | 1.15 – 3.39 | <b>0.014</b>     |
| Anticoagulants pre-stroke          | 0.71                 | 0.35 – 1.46 | 0.344            |
| Antiplatelets pre-stroke           | 1.07                 | 0.64 – 1.82 | 0.797            |
| Onset-to-Door time (h)             | 1.00                 | 0.98 – 1.05 | 0.803            |
| NIHSS on Admission                 | 0.99                 | 0.97 – 1.02 | 0.732            |
| Intravenous thrombolysis           | 0.84                 | 0.52 – 1.37 | 0.486            |
| Collaterals                        | 1.20                 | 0.95 – 1.52 | 0.127            |
| eTICI                              | 4.42                 | 3.48 – 5.76 | <b>&lt;0.001</b> |
| Intervention-to-Follow-up time (h) | 1.07                 | 1.03 – 1.11 | <b>&lt;0.001</b> |
| IA Urokinase                       | 2.78                 | 1.17 – 6.73 | <b>0.022</b>     |
| $\Delta R^2$                       | 0.416                |             |                  |

NIHSS: National Institutes of Health Stroke Scale; eTICI: eTICI: Expanded Thrombolysis in Cerebral Infarction; IA: intra-arterial.

Table S3 Balance of the IPTW-matched Cohort

| Variable                        | Means -Treated | Means - Control | Std. Mean Diff. | Var. Ratio | eCDF Mean |
|---------------------------------|----------------|-----------------|-----------------|------------|-----------|
| Age                             | 66.9550        | 69.2138         | -0.1632         | 0.9708     | 0.0683    |
| Sex (F)                         | 0.3500         | 0.3150          | 0.0735          | .          | 0.0350    |
| Sex (M)                         | 0.6500         | 0.6850          | -0.0735         | .          | 0.0350    |
| eTICI                           | 2.9750         | 3.0134          | -0.0384         | 1.1126     | 0.0254    |
| Onset-to-Door time (h)          | 3.1821         | 3.1834          | -0.0005         | 0.6007     | 0.0330    |
| Atrial fibrillation (No)        | 0.7500         | 0.7514          | -0.0032         | .          | 0.0014    |
| Atrial fibrillation (Yes)       | 0.2500         | 0.2486          | 0.0032          | .          | 0.0014    |
| Anticoagulants pre-stroke (No)  | 0.8250         | 0.8667          | -0.1099         | .          | 0.0417    |
| Anticoagulants pre-stroke (Yes) | 0.1750         | 0.1333          | 0.1099          | .          | 0.0417    |
| Antiplatelets pre-stroke (No)   | 0.7500         | 0.7984          | -0.1118         | .          | 0.0484    |
| Antiplatelets pre-stroke (Yes)  | 0.2500         | 0.2016          | 0.1118          | .          | 0.0484    |
| NIHSS on admission              | 10.9000        | 10.7108         | 0.0262          | 0.7114     | 0.0400    |
| Intravenous thrombolysis (No)   | 0.5500         | 0.6537          | -0.2084         | .          | 0.1037    |
| Intravenous thrombolysis (Yes)  | 0.4500         | 0.3463          | 0.2084          | .          | 0.1037    |
| ASITN/SIR collateral score      | 2.0750         | 2.0133          | 0.0673          | 1.0102     | 0.0128    |
| Angio-to-Follow-Up time (h)     | 18.1938        | 18.3470         | -0.0217         | 1.0907     | 0.0538    |

Effectiveness of propensity score matching and balance between the groups was checked with the measurement of standardized mean differences and empirical cumulative density function statistics. Value of these two statistics close to zero indicates good balance. eTICI: eTICI: Expanded Thrombolysis in Cerebral Infarction; NIHSS: National Institutes of Health Stroke Scale; ASITN/SIR: American Society of Interventional and Therapeutic Neuroradiology/Society of Interventional Radiology

Table S4 Differences in Unadjusted Odds Ratios and Point Causal Effects Between Unmatched and Matched Cohort

|                                                   | Initial unmatched | IPTW fully matched |
|---------------------------------------------------|-------------------|--------------------|
| (Intercept)                                       | 0.253***          | 1.000***           |
|                                                   | [0.219, 0.287]    | [1.000, 1.000]     |
| IA Urokianse                                      |                   |                    |
|                                                   |                   |                    |
| Odds Ratios                                       | 1.312***          | 1.625***           |
| 95% CI                                            | [1.141, 1.511]    | [1.263, 2.091]     |
|                                                   |                   |                    |
| Points of Average Treatment Effect                | 0.272***          | 0.487***           |
| 95% CI                                            | [0.132, 0.413]    | [0.236, 0.738]     |
|                                                   |                   |                    |
| Num.Obs.                                          | 459               | 459                |
| R2                                                | 0.015             | 0.021              |
| R2 Adj.                                           | 0.014             | 0.019              |
| + p < 0.1, * p < 0.05, ** p < 0.01, *** p < 0.001 |                   |                    |

Table S5 Secondary Outcomes In The IPTW Matched Cohort

|              | New infarct at 24 hours   |             |         |
|--------------|---------------------------|-------------|---------|
| Variable     | Adjusted Odds Ratios      | 95% CI      | P-Value |
| IA Urokinase | 0.27                      | 0.07 – 0.71 | 0.04    |
|              | mRS score 0-2 at 3 months |             |         |
| IA Urokinase | 1.35                      | 0.43 – 4.13 | 0.59    |
|              | sICH at 24 hours          |             |         |
| IA Urokinase | 0.85                      | 0.17 – 3.13 | 0.82    |

CI – confidence interval; IA – intra-arterial; mRS – modified Rankin scale; sICH – symptomatic intracranial hemorrhage. All logistic regression analysis were adjusted for following confounders: age, sex, atrial fibrillation, anticoagulants pre-stroke, antiplatelets pre-stroke, Onset-to-Door time (hours), National Institutes of Health Stroke Scale (NIHSS) score on admission, intravenous thrombolysis, collateral score, extended Thrombolysis in Cerebral Infarction (eTICI) score ;Intervention-to-Follow-Up time, perfusion imaging outcome (delayed reperfusion or persistent perfusion deficit) and IA urokinase. All point estimated suggested numerically better outcomes among patients who have received IA urokinase.

Figure S1 Flow Chart

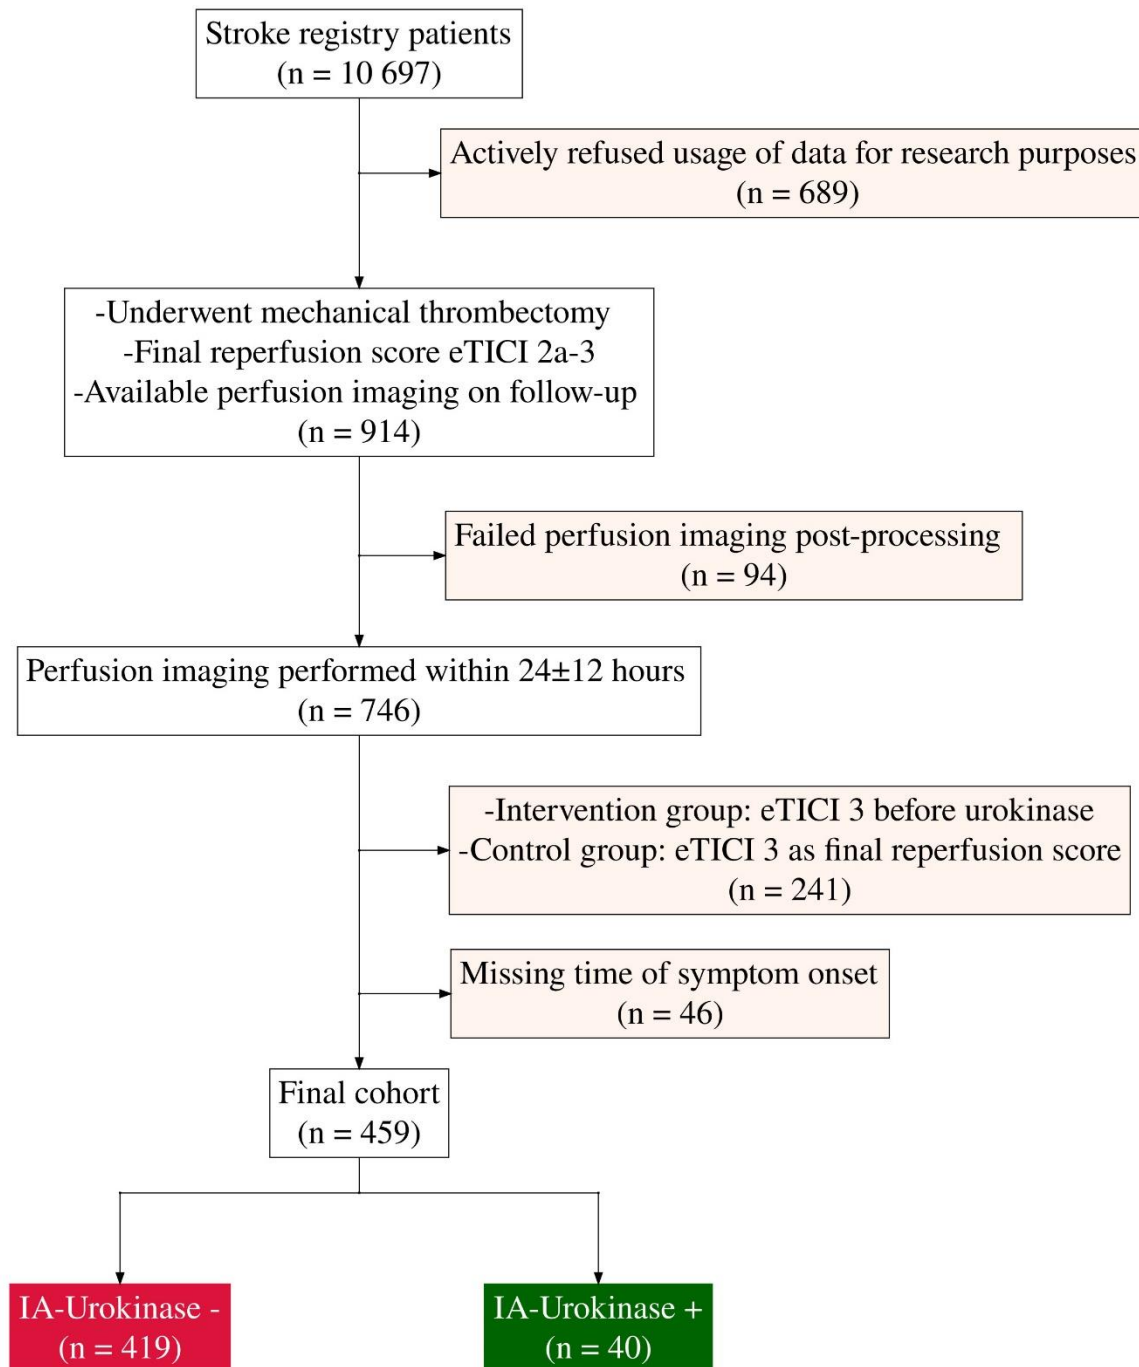



Figure S2 Perfusion Imaging Evaluation

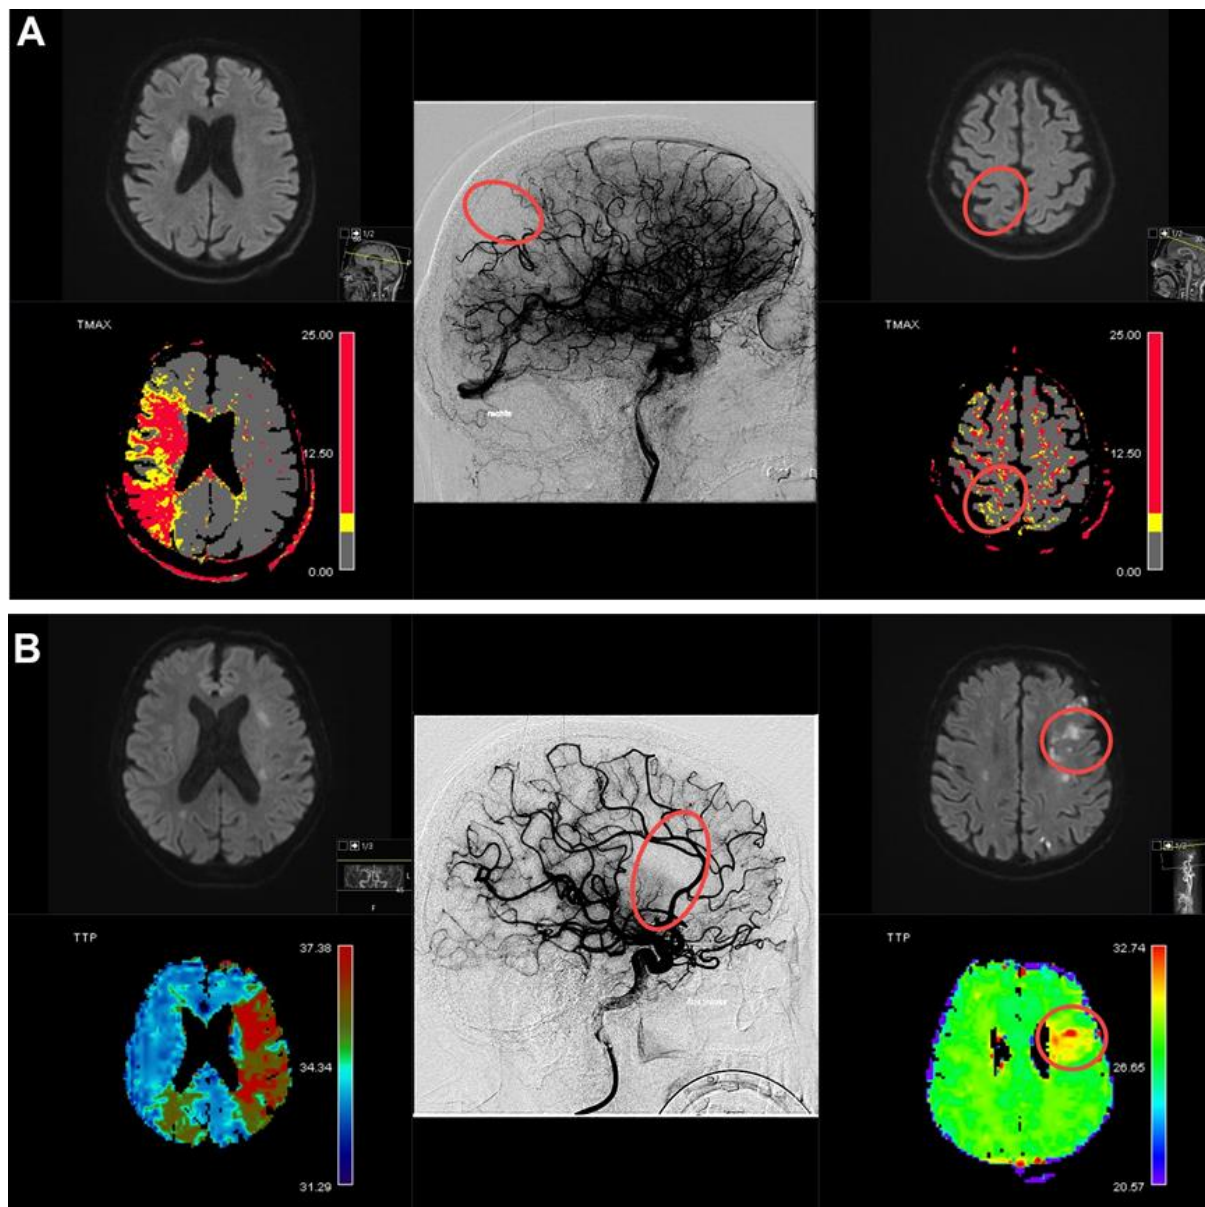

Perfusion maps (Tmax – time-to-maximum and TTP - time-to-peak) and diffusion-weighted imaging (DWI) were evaluated on admission and follow-up examinations. Final angiography runs are displayed with high contrast to emphasize the capillary phase deficits. A) Patient with a right side M1 occlusion with expanded Thrombolysis in Cerebral Infarction (eTICI) 2b67 reperfusion score at the end of the intervention (middle), together with corresponding admission DWI (top-left), admission perfusion imaging (bottom-left) and follow-up DWI (top-right). On the follow-up Tmax perfusion map (bottom-right) there is no wedge-shaped delay suggestive of persisting occlusion which would correspond to the non reperfused area from the final angiography imaging. This was rated as delayed reperfusion. B) Patient with a left side M1 occlusion with expanded Thrombolysis in Cerebral Infarction (eTICI) 2b50 reperfusion score at the end of the intervention (middle), together with corresponding admission DWI (top-left), admission perfusion imaging (bottom-left) and follow-up DWI (top-right). On the follow-up TTP perfusion map (bottom-right) there is a wedge-shaped delay suggestive of persisting occlusion which directly corresponds to the non reperfused area from the final angiography imaging. This was rated as persisting perfusion deficit.<sup>4</sup>

Figure S3 Group Balance Before and After IPTW Matching

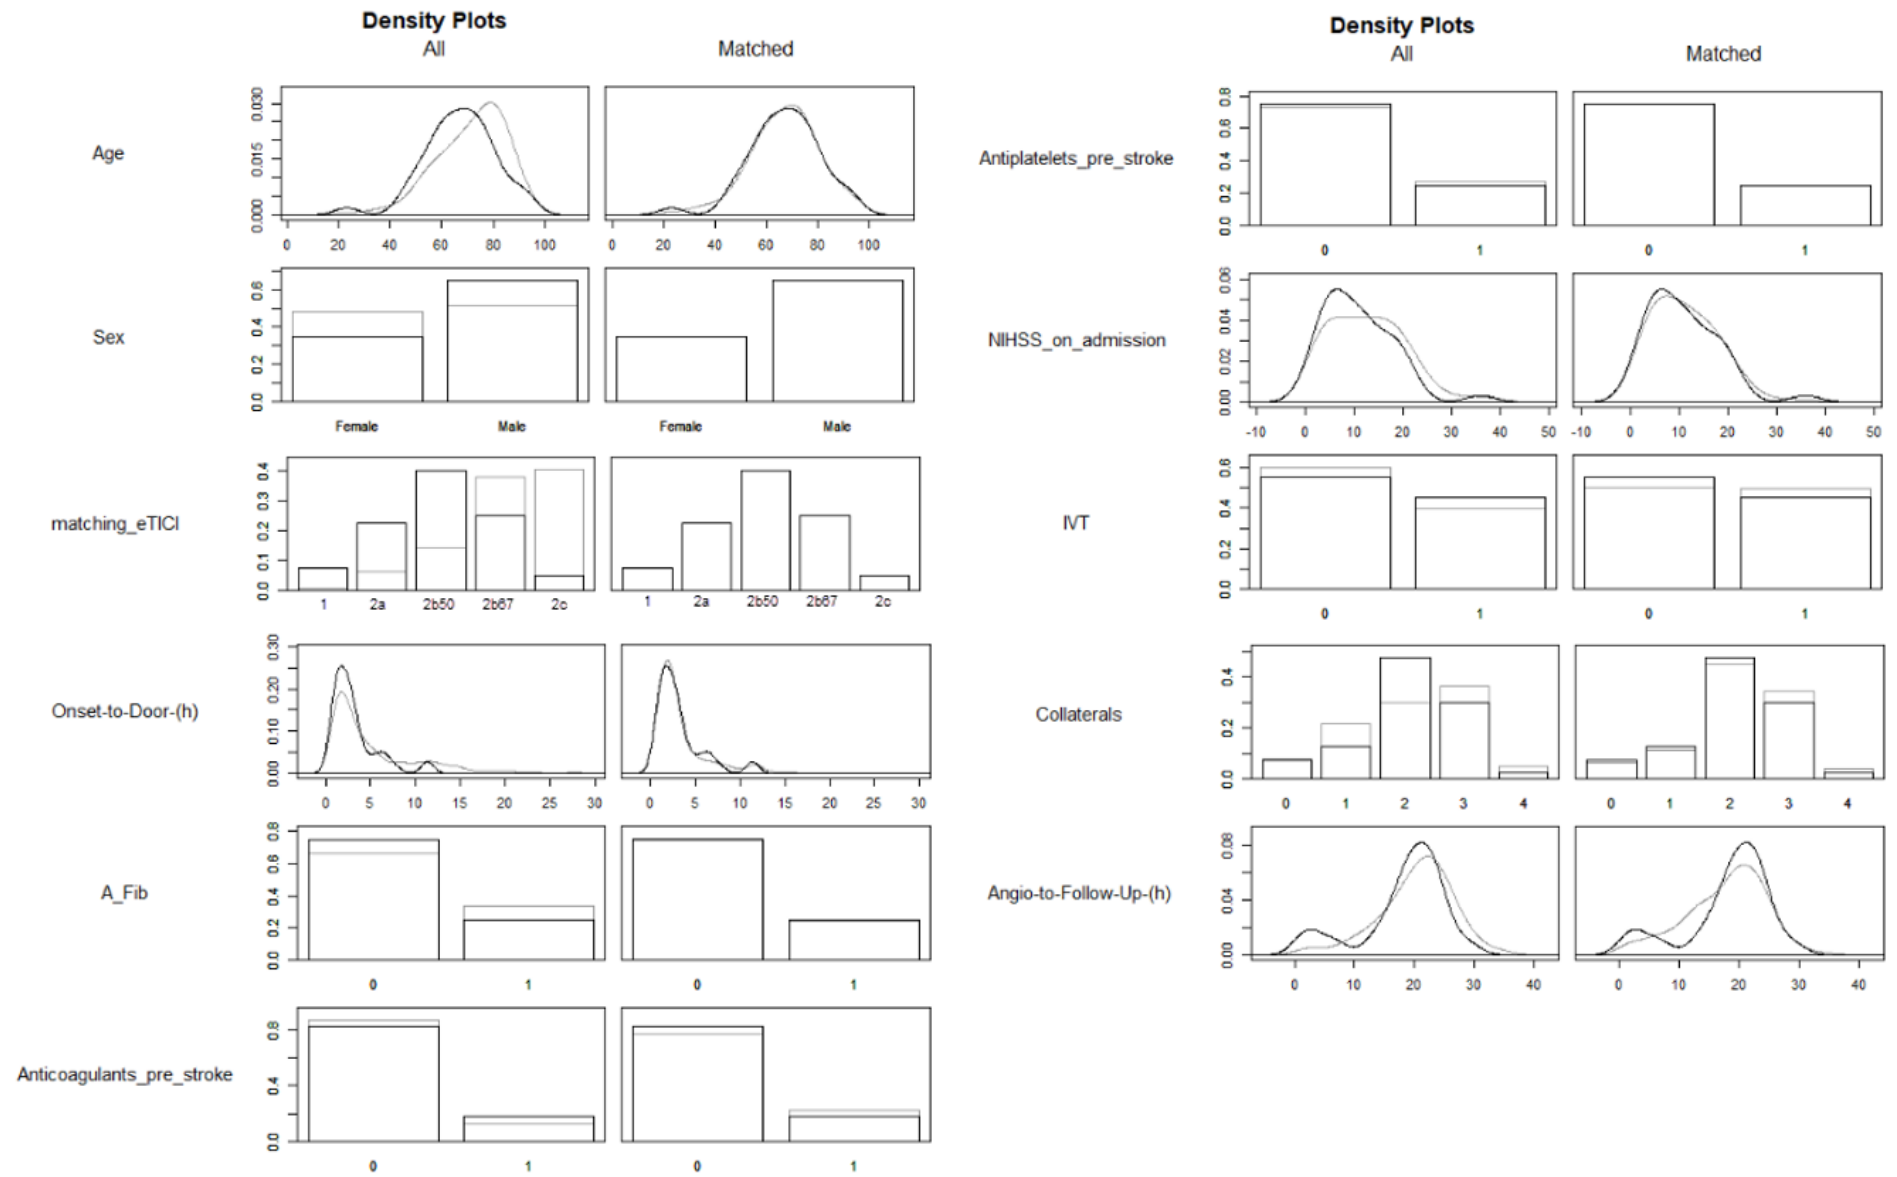

## REFERENCES

1. Shiba K, Kawahara T. Using propensity scores for causal inference: pitfalls and tips. *J. Epidemiol.* 2021;31:457–463.
2. Robins JM, Miguel Angel H, Babetter B. Marginal Structural Models and Causal Inference in Epidemiology. *Epidemiology.* 2000;5:550–560.
3. Raad H, Cornelius V, Chan S, Williamson E, Cro S. An evaluation of inverse probability weighting using the propensity score for baseline covariate adjustment in smaller population randomised controlled trials with a continuous outcome. *BMC Med. Res. Methodol.* 2020;20:1–12.
4. Mujanovic A, Jungi N, Kurmann CC, Dobrocky T, Meinel TR, Almiri W, Grunder L, Beyeler M, Lang MF, Jung S, et al. Importance of Delayed Reperfusions in Patients with Incomplete Thrombectomy. *Stroke.* 2022;53:3350–3358.
